# Supplementary material for: The transferability limits of static benchmarks
Source: Royal Society of Chemistry journal article supplement (doi:10.1039/d2cp01725c), 2022-01-01
Supplement: d2cp01725c1.pdf [file d2cp01725c1.pdf]

# The Transferability Limits of Static Benchmarks

Thomas Weymuth<sup>1</sup> and Markus Reiher<sup>2</sup>

Laboratory of Physical Chemistry, ETH Zurich,  
Vladimir-Prelog-Weg 2, 8093 Zurich, Switzerland

May 19, 2022

## Supplementary Information

---

<sup>1</sup>ORCID: 0000-0001-7102-7022

<sup>2</sup>Corresponding author; e-mail: markus.reiher@phys.chem.ethz.ch; ORCID: 0000-0002-9508-1565

Table 1: Overview of the individual subsets present in the data set compiled by Mardirossian and Head-Gordon.<sup>1</sup> “Uncertainty Labels” (UL, see main text for their definition) are given for selected generalized gradient approximation (GGA) and meta-GGA density functionals. The descriptions of the subsets have been adapted from Ref. 1.

| Subset     | Description                                                                                  | #   | UL (PBE)    | UL (B97-D3(0)) | UL (TPSS)  | UL (B97M-rV) |
|------------|----------------------------------------------------------------------------------------------|-----|-------------|----------------|------------|--------------|
| 3B-69-DIM  | Binding energies of all relevant pairs of monomers from 3B-69-TRIM                           | 207 | 0.0, 2.0    | 0.0, 2.1       | 0.0, 1.6   | 0.0, 2.1     |
| 3B-69-TRIM | Binding energies of trimers (three different orientations of 23 distinct molecular crystals) | 69  | 0.0, 0.4    | 0.0, 0.7       | -0.1, -0.5 | 0.0, 0.7     |
| A21x12     | Potential energy curves (PECS) for the 21 equilibrium complexes from A24                     | 252 | 0.0, 2.6    | 0.0, 2.6       | 0.0, 2.6   | 0.0, 2.6     |
| A24        | Binding energies of small non-covalent complexes                                             | 24  | 0.0, 0.2    | 0.0, 0.2       | 0.0, 0.2   | 0.0, 0.2     |
| ACONF      | Isomerisation energies of alkane conformers                                                  | 15  | 0.0, 0.1    | 0.0, 0.2       | 0.0, 0.1   | 0.0, 0.2     |
| AE18       | Absolute atomic energies of hydrogen through argon                                           | 18  | -3.0, -15.2 | -0.7, -1.6     | -0.3, -2.7 | -6.6, -23.0  |
| AlkAtom19  | n = 1 - 8 alkane atomisation energies                                                        | 19  | -0.1, -0.6  | -0.1, -0.8     | 0.0, 0.1   | 0.0, 0.2     |

|              |                                                                                               |     |            |            |            |            |
|--------------|-----------------------------------------------------------------------------------------------|-----|------------|------------|------------|------------|
| AlkBind12    | Binding energies of saturated and unsaturated hydrocarbon dimers                              | 12  | 0.0, 0.1   | 0.0, 0.1   | 0.0, 0.0   | 0.0, 0.1   |
| AlkIsod14    | n = 3–8 alkane isodesmic reaction energies                                                    | 14  | 0.0, 0.1   | 0.0, 0.1   | -0.1, -0.1 | 0.0, 0.1   |
| AlkIsomer11  | Isomerisation energies of n = 4–8 alkanes                                                     | 11  | 0.0, 0.1   | 0.0, 0.1   | 0.0, 0.1   | 0.0, 0.1   |
| Bauza30      | Binding energies of halogen-, chalcogen-, and pnictogen-bonded dimers                         | 30  | 0.0, 0.2   | 0.0, 0.2   | 0.0, 0.2   | 0.0, 0.2   |
| BDE99MR      | Bond dissociation energies (multi-reference cases)                                            | 16  | -0.1, -0.4 | 0.0, -0.2  | 0.0, -0.1  | 0.0, 0.0   |
| BDE99nonMR   | Bond dissociation energies (single-reference cases)                                           | 83  | -0.1, -0.5 | -0.1, 0.1  | 0.0, 0.0   | -0.2, -0.2 |
| BH76RC       | Reaction energies from HTBH38 and NHTBH38                                                     | 30  | -0.1, 0.1  | -0.1, 0.1  | 0.0, 0.0   | -0.1, 0.1  |
| BHPERI26     | Barrier heights of pericyclic reactions                                                       | 26  | 0.0, 0.2   | 0.0, 0.1   | 0.0, 0.2   | 0.0, 0.2   |
| BSR36        | Hydrocarbon bond separation reaction energies                                                 | 36  | -0.1, -0.3 | -0.2, -0.7 | -0.3, -1.8 | 0.0, 0.4   |
| Butanediol65 | Isomerisation energies of butane-1,4-diol                                                     | 65  | 0.0, 0.7   | 0.0, 0.7   | 0.0, 0.7   | 0.0, 0.7   |
| BzDC215      | PECs for benzene interacting with two rare-gas atoms and eight first- and second-row hydrides | 215 | 0.0, 2.2   | 0.0, 2.2   | 0.0, 2.0   | 0.0, 2.2   |
| C20C24       | Isomerisation energies of the ground state structures of C <sub>20</sub> and C <sub>24</sub>  | 8   | -0.6, -0.9 | -4.1, -9.1 | -2.3, -3.7 | -3.3, -5.2 |

|               |                                                                                          |    |            |            |            |            |
|---------------|------------------------------------------------------------------------------------------|----|------------|------------|------------|------------|
| CE20          | Binding energies of water, ammonia, and hydrogen fluoride clusters                       | 20 | 0.0, 0.2   | 0.0, 0.2   | 0.0, 0.1   | 0.0, 0.2   |
| CO2Nitrogen16 | Binding energies of CO <sub>2</sub> to molecular models of pyridinic N-doped graphene    | 16 | 0.0, 0.1   | 0.0, 0.2   | 0.0, 0.1   | 0.0, 0.2   |
| CR20          | Cycloreversion reaction energies                                                         | 20 | 0.0, 0.2   | -0.1, -1.3 | 0.0, -0.1  | 0.0, 0.1   |
| CRBH20        | Barrier heights for cycloreversion of heterocyclic rings                                 | 20 | 0.0, -0.1  | -0.2, -2.4 | -0.1, -0.6 | -0.1, -1.0 |
| CT20          | Binding energies of charge-transfer complexes                                            | 20 | 0.0, 0.2   | 0.0, 0.2   | 0.0, 0.2   | 0.0, 0.2   |
| CYCONF        | Isomerisation energies of cysteine conformers                                            | 11 | 0.0, 0.1   | 0.0, 0.1   | 0.0, 0.1   | 0.0, 0.1   |
| DBH24         | Diverse barrier heights                                                                  | 24 | -0.2, -0.2 | -0.2, -0.4 | -0.2, -0.6 | -0.1, -0.4 |
| DIE60         | Isomerisation energies of reactions involving double-bond migration in conjugated dienes | 60 | 0.0, 0.6   | 0.0, 0.5   | 0.0, 0.5   | 0.0, 0.4   |
| DS14          | Binding energies of complexes containing divalent sulfur                                 | 14 | 0.0, 0.1   | 0.0, 0.1   | 0.0, 0.1   | 0.0, 0.1   |
| EA13          | Adiabatic electron affinities                                                            | 13 | 0.0, 0.1   | 0.0, 0.0   | 0.0, 0.1   | 0.0, 0.1   |
| EIE22         | Isomerisation energies of en carbonyls                                                   | 22 | 0.0, 0.2   | 0.0, 0.2   | 0.0, 0.2   | 0.0, 0.1   |
| FmH2O10       | Binding energies of isomers of F-(H <sub>2</sub> O) <sub>10</sub>                        | 10 | 0.0, 0.0   | 0.0, -0.2  | -0.1, -1.0 | 0.0, 0.1   |
| G2IEA         | Adiabatic electron affinities of atoms and small molecules                               | 25 | 0.0, 0.2   | 0.0, 0.1   | 0.0, 0.1   | 0.0, 0.1   |

|             |                                                                                             |     |            |            |            |            |
|-------------|---------------------------------------------------------------------------------------------|-----|------------|------------|------------|------------|
| G2IIP       | Adiabatic ionisation potentials of atoms and small molecules                                | 36  | 0.0, 0.2   | 0.0, 0.0   | 0.0, 0.0   | -0.1, -0.1 |
| H2O16Rel5   | Isomerisation energies of (H <sub>2</sub> O) <sub>16</sub> (boat and fused cube structures) | 5   | 0.0, 0.0   | 0.0, 0.0   | 0.0, 0.0   | 0.0, 0.0   |
| H2O20Bind10 | Binding energies of isomers of (H <sub>2</sub> O) <sub>20</sub> (low-energy structures)     | 10  | 0.0, -0.2  | -0.1, -1.3 | -0.5, -3.9 | 0.0, 0.1   |
| H2O20Bind4  | Binding energies of isomers of (H <sub>2</sub> O) <sub>20</sub> (dod, fc, fs, and es)       | 4   | 0.0, 0.0   | 0.0, -0.1  | -0.2, -0.6 | 0.0, 0.0   |
| H2O20Rel10  | Isomerisation energies of (H <sub>2</sub> O) <sub>20</sub> (low-energy structures)          | 10  | 0.0, 0.1   | 0.0, 0.1   | 0.0, 0.1   | 0.0, 0.1   |
| H2O20Rel4   | Isomerisation energies of (H <sub>2</sub> O) <sub>20</sub> (dod, fc, fs, and es)            | 4   | 0.0, 0.0   | 0.0, 0.0   | 0.0, 0.0   | 0.0, 0.0   |
| H2O6Bind8   | Binding energies of isomers of (H <sub>2</sub> O) <sub>6</sub>                              | 8   | 0.0, 0.1   | 0.0, 0.0   | 0.0, 0.0   | 0.0, 0.1   |
| HAT707MR    | Heavy-atom transfer energies (multi-reference cases)                                        | 202 | -0.1, -1.4 | -0.2, -3.8 | -0.1, -3.1 | -0.1, -0.3 |
| HAT707nonMR | Heavy-atom transfer energies (single-reference cases)                                       | 505 | -0.1, -0.8 | -0.1, -2.1 | -0.1, -2.6 | -0.1, -3.0 |
| HB15        | Binding energies of hydrogen-bonded dimers featuring ionic groups common in biomolecules    | 15  | 0.0, 0.1   | 0.0, 0.1   | 0.0, 0.1   | 0.0, 0.1   |
| HB49        | Binding energies of small- and medium-sized hydrogen-bonded systems                         | 49  | 0.0, 0.5   | 0.0, 0.5   | 0.0, 0.5   | 0.0, 0.5   |
| HNBrBDE18   | Homolytic N-Br bond dissociation energies                                                   | 18  | 0.0, 0.2   | 0.0, -0.2  | 0.0, 0.1   | 0.0, -0.1  |

|                 |                                                                                |     |            |            |            |            |
|-----------------|--------------------------------------------------------------------------------|-----|------------|------------|------------|------------|
| HSG             | Binding energies of small ligands interacting with protein receptors           | 21  | 0.0, 0.2   | 0.0, 0.2   | 0.0, 0.2   | 0.0, 0.2   |
| HTBH38          | Hydrogen transfer barrier heights                                              | 38  | -0.1, -0.4 | -0.1, -0.9 | -0.1, -0.7 | -0.1, -0.4 |
| HW30            | Binding energies of hydrocarbon-water dimers                                   | 30  | 0.0, 0.3   | 0.0, 0.3   | 0.0, 0.3   | 0.0, 0.3   |
| HW6C1           | Binding energies of $\text{Cl}-(\text{H}_2\text{O})_n$ ( $n = 1-6$ )           | 6   | 0.0, 0.1   | 0.0, 0.1   | 0.0, 0.0   | 0.0, 0.1   |
| HW6F            | Binding energies of $\text{F}-(\text{H}_2\text{O})_n$ ( $n = 1-6$ )            | 6   | 0.0, 0.1   | 0.0, 0.0   | 0.0, 0.0   | 0.0, 0.1   |
| Ionic43         | Binding energies of anion-neutral, cation-neutral, and anion-cation dimers     | 43  | 0.0, 0.4   | 0.0, 0.4   | 0.0, 0.4   | 0.0, 0.4   |
| IP13            | Adiabatic ionisation potentials                                                | 13  | 0.0, 0.1   | 0.0, 0.0   | 0.0, 0.0   | 0.0, -0.1  |
| ISOMERIZATION20 | Isomerisation energies                                                         | 20  | 0.0, 0.1   | 0.0, 0.1   | 0.0, 0.1   | 0.0, 0.0   |
| Melatonin52     | Isomerisation energies of melatonin                                            | 52  | 0.0, 0.5   | 0.0, 0.5   | 0.0, 0.4   | 0.0, 0.5   |
| NBC10           | PECs for methane dimer and dimers of small aromatic systems                    | 184 | 0.0, 1.6   | 0.0, 1.9   | 0.0, 0.9   | 0.0, 1.9   |
| NBPRC           | Reactions involving $\text{NH}_3/\text{BH}_3$ and $\text{PH}_3/\text{BH}_3$    | 12  | 0.0, 0.1   | -0.1, 0.0  | 0.0, 0.1   | 0.0, 0.1   |
| NC15            | Binding energies of very small non-covalent complexes                          | 15  | 0.0, 0.2   | 0.0, 0.2   | 0.0, 0.2   | 0.0, 0.2   |
| NHTBH38         | Non-hydrogen transfer barrier heights                                          | 38  | -0.2, -0.4 | -0.2, -0.7 | -0.2, -1.2 | -0.2, -0.7 |
| Pentane14       | Isomerisation energies of stationary points on the n-pentane torsional surface | 14  | 0.0, 0.1   | 0.0, 0.1   | 0.0, 0.1   | 0.0, 0.1   |

|              |                                                                                                     |     |            |            |            |            |
|--------------|-----------------------------------------------------------------------------------------------------|-----|------------|------------|------------|------------|
| PlatonicHD6  | Homodesmotic reactions involving platonic hydrocarbon cages, $C_nH_n$ ( $n = 4, 6, 8, 10, 12, 20$ ) | 6   | -0.1, -0.5 | -0.2, -0.3 | -0.7, -3.2 | -0.1, -0.1 |
| PlatonicID6  | Isodesmic reactions involving platonic hydrocarbon cages, $C_nH_n$ ( $n = 4, 6, 8, 10, 12, 20$ )    | 6   | -0.1, -0.1 | -0.5, -0.7 | -0.2, -0.4 | -0.1, -0.1 |
| PlatonicIG6  | Isogyric reactions involving platonic hydrocarbon cages, $C_nH_n$ ( $n = 4, 6, 8, 10, 12, 20$ )     | 6   | -0.3, -0.3 | -0.2, -0.4 | -0.4, -0.5 | -1.7, -2.6 |
| PlatonicTAE6 | Total atomisation energies of platonic hydrocarbon cages, $C_nH_n$ ( $n = 4, 6, 8, 10, 12, 20$ )    | 6   | -2.0, -4.9 | -3.9, -6.1 | -0.8, -0.9 | 0.0, -0.1  |
| PX13         | Barrier heights for proton exchange in water, ammonia, and hydrogen fluoride clusters               | 13  | -0.1, -0.3 | 0.0, -0.1  | -0.1, -0.2 | 0.0, 0.1   |
| RG10         | PECs for the 10 rare-gas dimers involving helium through krypton                                    | 569 | 0.0, 6.2   | 0.0, 6.2   | 0.0, 6.2   | 0.0, 6.2   |
| S22          | Binding energies of hydrogen-bonded and dispersion-bound non-covalent complexes                     | 22  | 0.0, 0.2   | 0.0, 0.2   | -0.1, 0.0  | 0.0, 0.2   |
| S66          | Binding energies of non-covalent interactions found in organic molecules and biomolecules           | 66  | 0.0, 0.6   | 0.0, 0.7   | 0.0, 0.3   | 0.0, 0.7   |
| S66x8        | PECs for the 66 complexes from S66                                                                  | 528 | 0.0, 5.2   | 0.0, 5.7   | 0.0, 3.8   | 0.0, 5.7   |
| Shields38    | Binding energies of $(H_2O)_n$ ( $n = 2-10$ )                                                       | 38  | 0.0, 0.4   | 0.0, 0.3   | 0.0, 0.2   | 0.0, 0.4   |

|             |                                                                                                        |     |            |            |            |            |
|-------------|--------------------------------------------------------------------------------------------------------|-----|------------|------------|------------|------------|
| SN13        | Nucleophilic substitution energies                                                                     | 13  | 0.0, 0.0   | 0.0, 0.0   | 0.0, 0.0   | 0.0, 0.1   |
| Styrene45   | Isomerisation energies of C <sub>8</sub> H <sub>8</sub>                                                | 45  | 0.0, 0.3   | -0.1, -0.7 | -0.1, 0.1  | -0.1, -0.4 |
| SW49Bind345 | Binding energies of isomers of SO <sub>4</sub> <sup>2-</sup> (H <sub>2</sub> O) <sub>n</sub> (n = 3-5) | 31  | 0.0, 0.3   | 0.0, 0.3   | 0.0, 0.2   | 0.0, 0.3   |
| SW49Bind6   | Binding energies of isomers of SO <sub>4</sub> <sup>2-</sup> (H <sub>2</sub> O) <sub>6</sub>           | 18  | 0.0, 0.2   | 0.0, 0.2   | 0.0, -0.1  | 0.0, 0.2   |
| SW49Rel345  | Isomerisation energies of SO <sub>4</sub> <sup>2-</sup> (H <sub>2</sub> O) <sub>n</sub> (n = 3-5)      | 31  | 0.0, 0.3   | 0.0, 0.3   | 0.0, 0.3   | 0.0, 0.3   |
| SW49Rel6    | Isomerisation energies of SO <sub>4</sub> <sup>2-</sup> (H <sub>2</sub> O) <sub>6</sub>                | 18  | 0.0, 0.2   | 0.0, 0.2   | 0.0, 0.2   | 0.0, 0.2   |
| TA13        | Binding energies of dimers involving radicals                                                          | 13  | 0.0, 0.0   | -0.1, -0.1 | -0.1, 0.0  | -0.1, -0.1 |
| TAE140MR    | Total atomisation energies (multi-reference cases)                                                     | 16  | -0.6, -2.7 | -0.3, -1.0 | -0.2, -0.7 | -0.1, -0.4 |
| TAE140nonMR | Total atomisation energies (single-reference cases)                                                    | 124 | -0.3, -5.9 | -0.2, -0.1 | -0.1, -0.3 | -0.7, -0.7 |
| WATER27     | Binding energies of neutral and charged water clusters                                                 | 23  | 0.0, 0.2   | 0.0, 0.2   | 0.0, 0.1   | 0.0, 0.2   |
| WCPT27      | Barrier heights of water-catalysed proton-transfer reactions                                           | 27  | -0.1, -0.3 | -0.1, -0.2 | 0.0, -0.1  | 0.0, 0.1   |
| WCPT6       | Tautomerisation energies for water-catalysed proton-transfer reactions                                 | 6   | 0.0, 0.1   | 0.0, 0.1   | 0.0, 0.1   | 0.0, 0.1   |
| X40         | Binding energies of non-covalent interactions involving halogenated molecules                          | 31  | 0.0, 0.3   | 0.0, 0.3   | 0.0, 0.2   | 0.0, 0.3   |



|         |                                                          |     |          |          |          |          |
|---------|----------------------------------------------------------|-----|----------|----------|----------|----------|
| XB18    | Binding energies of small halogen-bonded dimers          | 8   | 0.0, 0.1 | 0.0, 0.1 | 0.0, 0.1 | 0.0, 0.1 |
| XB51    | Binding energies of large halogen-bonded dimers          | 20  | 0.0, 0.2 | 0.0, 0.2 | 0.0, 0.2 | 0.0, 0.2 |
| YMPJ519 | Isomerisation energies of the pro-teinogetic amino acids | 519 | 0.0, 5.6 | 0.0, 5.5 | 0.0, 5.4 | 0.0, 5.6 |

Table 2: Overview of the individual subsets present in the data set compiled by Mardirossian and Head-Gordon.<sup>1</sup> “Uncertainty Labels” (UL, see main text for their definition) are given for selected generalized gradient approximation (GGA) and meta-GGA density functionals. The descriptions of the subsets have been adapted from Ref. 1.

| Subset     | Description                                                                                  | #   | UL (PBE0)   | UL ( $\omega$ B97M-V) |
|------------|----------------------------------------------------------------------------------------------|-----|-------------|-----------------------|
| 3B-69-DIM  | Binding energies of all relevant pairs of monomers from 3B-69-TRIM                           | 207 | 0.0, 1.8    | 0.0, 2.1              |
| 3B-69-TRIM | Binding energies of trimers (three different orientations of 23 distinct molecular crystals) | 69  | 0.0, 0.0    | 0.0, 0.7              |
| A21x12     | Potential energy curves (PECS) for the 21 equilibrium complexes from A24                     | 252 | 0.0, 2.6    | 0.0, 2.6              |
| A24        | Binding energies of small non-covalent complexes                                             | 24  | 0.0, 0.2    | 0.0, 0.2              |
| ACONF      | Isomerisation energies of alkane conformers                                                  | 15  | 0.0, 0.1    | 0.0, 0.2              |
| AE18       | Absolute atomic energies of hydrogen through argon                                           | 18  | -4.7, -25.9 | -0.4, -2.3            |
| AlkAtom19  | n = 1-8 alkane atomisation energies                                                          | 19  | 0.0, 0.2    | 0.0, 0.1              |

|              |                                                                                               |     |            |            |
|--------------|-----------------------------------------------------------------------------------------------|-----|------------|------------|
| AlkBind12    | Binding energies of saturated and unsaturated hydrocarbon dimers                              | 12  | 0.0, 0.0   | 0.0, 0.1   |
| AlkIsod14    | n = 3–8 alkane isodesmic reaction energies                                                    | 14  | 0.0, 0.0   | 0.0, 0.1   |
| AlkIsomer11  | Isomerisation energies of n = 4–8 alkanes                                                     | 11  | 0.0, 0.1   | 0.0, 0.1   |
| Bauza30      | Binding energies of halogen-, chalcogen-, and pnictogen-bonded dimers                         | 30  | 0.0, 0.2   | 0.0, 0.3   |
| BDE99MR      | Bond dissociation energies (multi-reference cases)                                            | 16  | 0.0, 0.0   | -0.3, -1.0 |
| BDE99nonMR   | Bond dissociation energies (single-reference cases)                                           | 83  | -0.1, 0.1  | -0.5, -1.2 |
| BH76RC       | Reaction energies from HTBH38 and NHTBH38                                                     | 30  | 0.0, 0.2   | 0.0, 0.1   |
| BHPERI26     | Barrier heights of pericyclic reactions                                                       | 26  | 0.0, 0.2   | -0.1, 0.0  |
| BSR36        | Hydrocarbon bond separation reaction energies                                                 | 36  | -0.2, -1.2 | 0.0, 0.2   |
| Butanediol65 | Isomerisation energies of butane-1,4-diol                                                     | 65  | 0.0, 0.7   | 0.0, 0.7   |
| BzDC215      | PECs for benzene interacting with two rare-gas atoms and eight first- and second-row hydrides | 215 | 0.0, 2.1   | 0.0, 2.2   |
| C20C24       | Isomerisation energies of the ground state structures of C <sub>20</sub> and C <sub>24</sub>  | 8   | -0.5, -0.8 | -0.7, -1.5 |

|               |                                                                                          |    |           |            |
|---------------|------------------------------------------------------------------------------------------|----|-----------|------------|
| CE20          | Binding energies of water, ammonia, and hydrogen fluoride clusters                       | 20 | 0.0, 0.2  | 0.0, 0.2   |
| CO2Nitrogen16 | Binding energies of CO <sub>2</sub> to molecular models of pyridinic N-doped graphene    | 16 | 0.0, 0.1  | 0.0, 0.2   |
| CR20          | Cycloreversion reaction energies                                                         | 20 | 0.0, 0.2  | 0.0, 0.2   |
| CRBH20        | Barrier heights for cycloreversion of heterocyclic rings                                 | 20 | 0.0, 0.2  | 0.0, 0.1   |
| CT20          | Binding energies of charge-transfer complexes                                            | 20 | 0.0, 0.2  | 0.0, 0.2   |
| CYCONF        | Isomerisation energies of cysteine conformers                                            | 11 | 0.0, 0.1  | 0.0, 0.1   |
| DBH24         | Diverse barrier heights                                                                  | 24 | -0.1, 0.0 | 0.0, 0.0   |
| DIE60         | Isomerisation energies of reactions involving double-bond migration in conjugated dienes | 60 | 0.0, 0.5  | 0.0, 0.5   |
| DS14          | Binding energies of complexes containing divalent sulfur                                 | 14 | 0.0, 0.1  | 0.0, 0.1   |
| EA13          | Adiabatic electron affinities                                                            | 13 | 0.0, 0.1  | -0.1, -0.1 |
| EIE22         | Isomerisation energies of enecarbonyls                                                   | 22 | 0.0, 0.2  | 0.0, 0.2   |
| FmH2O10       | Binding energies of isomers of F-(H <sub>2</sub> O) <sub>10</sub>                        | 10 | 0.0, 0.0  | 0.0, 0.1   |
| G2IEA         | Adiabatic electron affinities of atoms and small molecules                               | 25 | 0.0, 0.1  | -0.2, -0.5 |

|             |                                                                                          |     |            |             |
|-------------|------------------------------------------------------------------------------------------|-----|------------|-------------|
| G2IIP       | Adiabatic ionisation potentials of atoms and small molecules                             | 36  | 0.0, 0.0   | -0.3, -1.6  |
| H2O16Rel5   | Isomerisation energies of $(\text{H}_2\text{O})_{16}$ (boat and fused cube structures)   | 5   | 0.0, 0.0   | 0.0, 0.1    |
| H2O20Bind10 | Binding energies of isomers of $(\text{H}_2\text{O})_{20}$ (low-energy structures)       | 10  | -0.1, -0.4 | 0.0, 0.1    |
| H2O20Bind4  | Binding energies of isomers of $(\text{H}_2\text{O})_{20}$ (dod, fc, fs, and es)         | 4   | 0.0, -0.1  | 0.0, 0.0    |
| H2O20Rel10  | Isomerisation energies of $(\text{H}_2\text{O})_{20}$ (low-energy structures)            | 10  | 0.0, 0.1   | 0.0, 0.1    |
| H2O20Rel4   | Isomerisation energies of $(\text{H}_2\text{O})_{20}$ (dod, fc, fs, and es)              | 4   | 0.0, 0.0   | 0.0, 0.0    |
| H2O6Bind8   | Binding energies of isomers of $(\text{H}_2\text{O})_6$                                  | 8   | 0.0, 0.1   | 0.0, 0.1    |
| HAT707MR    | Heavy-atom transfer energies (multi-reference cases)                                     | 202 | -0.1, 0.2  | -0.4, -13.2 |
| HAT707nonMR | Heavy-atom transfer energies (single-reference cases)                                    | 505 | -0.1, -1.4 | -0.4, -10.3 |
| HB15        | Binding energies of hydrogen-bonded dimers featuring ionic groups common in biomolecules | 15  | 0.0, 0.1   | 0.0, 0.1    |
| HB49        | Binding energies of small- and medium-sized hydrogen-bonded systems                      | 49  | 0.0, 0.5   | 0.0, 0.5    |
| HNBBrBDE18  | Homolytic N-Br bond dissociation energies                                                | 18  | 0.0, 0.1   | -0.1, -0.3  |

|                 |                                                                                |     |           |            |
|-----------------|--------------------------------------------------------------------------------|-----|-----------|------------|
| HSG             | Binding energies of small ligands interacting with protein receptors           | 21  | 0.0, 0.2  | 0.0, 0.2   |
| HTBH38          | Hydrogen transfer barrier heights                                              | 38  | 0.0, 0.0  | -0.1, -0.1 |
| HW30            | Binding energies of hydrocarbon-water dimers                                   | 30  | 0.0, 0.3  | 0.0, 0.3   |
| HW6Cl           | Binding energies of $\text{Cl}-(\text{H}_2\text{O})_n$ ( $n = 1-6$ )           | 6   | 0.0, 0.1  | 0.0, 0.1   |
| HW6F            | Binding energies of $\text{F}-(\text{H}_2\text{O})_n$ ( $n = 1-6$ )            | 6   | 0.0, 0.1  | 0.0, 0.1   |
| Ionic43         | Binding energies of anion-neutral, cation-neutral, and anion-cation dimers     | 43  | 0.0, 0.4  | 0.0, 0.4   |
| IP13            | Adiabatic ionisation potentials                                                | 13  | 0.0, 0.0  | -0.1, -0.4 |
| ISOMERIZATION20 | Isomerisation energies                                                         | 20  | 0.0, 0.1  | -0.1, -0.1 |
| Melatonin52     | Isomerisation energies of melatonin                                            | 52  | 0.0, 0.4  | 0.0, 0.5   |
| NBC10           | PECs for methane dimer and dimers of small aromatic systems                    | 184 | 0.0, 1.1  | 0.0, 1.9   |
| NBPRC           | Reactions involving $\text{NH}_3/\text{BH}_3$ and $\text{PH}_3/\text{BH}_3$    | 12  | 0.0, 0.1  | 0.0, 0.1   |
| NC15            | Binding energies of very small non-covalent complexes                          | 15  | 0.0, 0.2  | 0.0, 0.2   |
| NHTBH38         | Non-hydrogen transfer barrier heights                                          | 38  | -0.1, 0.0 | -0.1, -0.2 |
| Pentane14       | Isomerisation energies of stationary points on the n-pentane torsional surface | 14  | 0.0, 0.1  | 0.0, 0.1   |

|              |                                                                                                     |     |            |            |
|--------------|-----------------------------------------------------------------------------------------------------|-----|------------|------------|
| PlatonicHD6  | Homodesmotic reactions involving platonic hydrocarbon cages, $C_nH_n$ ( $n = 4, 6, 8, 10, 12, 20$ ) | 6   | -0.1, -0.6 | -0.1, -0.4 |
| PlatonicID6  | Isodesmic reactions involving platonic hydrocarbon cages, $C_nH_n$ ( $n = 4, 6, 8, 10, 12, 20$ )    | 6   | -0.4, -0.4 | 0.0, 0.0   |
| PlatonicIG6  | Isogyric reactions involving platonic hydrocarbon cages, $C_nH_n$ ( $n = 4, 6, 8, 10, 12, 20$ )     | 6   | -1.3, -1.9 | -0.7, -1.0 |
| PlatonicTAE6 | Total atomisation energies of platonic hydrocarbon cages, $C_nH_n$ ( $n = 4, 6, 8, 10, 12, 20$ )    | 6   | -1.1, -2.8 | -0.1, -0.3 |
| PX13         | Barrier heights for proton exchange in water, ammonia, and hydrogen fluoride clusters               | 13  | 0.0, -0.2  | -0.1, -0.2 |
| RG10         | PECs for the 10 rare-gas dimers involving helium through krypton                                    | 569 | 0.0, 6.2   | 0.0, 6.2   |
| S22          | Binding energies of hydrogen-bonded and dispersion-bound non-covalent complexes                     | 22  | 0.0, 0.1   | 0.0, 0.2   |
| S66          | Binding energies of non-covalent interactions found in organic molecules and biomolecules           | 66  | 0.0, 0.5   | 0.0, 0.7   |
| S66x8        | PECs for the 66 complexes from S66                                                                  | 528 | 0.0, 4.4   | 0.0, 5.7   |
| Shields38    | Binding energies of $(H_2O)_n$ ( $n = 2 - 10$ ) <sup>b</sup>                                        | 38  | 0.0, 0.4   | 0.0, 0.3   |

|             |                                                                                                        |     |           |            |
|-------------|--------------------------------------------------------------------------------------------------------|-----|-----------|------------|
| SN13        | Nucleophilic substitution energies                                                                     | 13  | 0.0, 0.1  | 0.0, 0.1   |
| Styrene45   | Isomerisation energies of C <sub>8</sub> H <sub>8</sub>                                                | 45  | 0.0, 0.2  | -0.1, -0.2 |
| SW49Bind345 | Binding energies of isomers of SO <sub>4</sub> <sup>2-</sup> (H <sub>2</sub> O) <sub>n</sub> (n = 3-5) | 31  | 0.0, 0.3  | 0.0, 0.3   |
| SW49Bind6   | Binding energies of isomers of SO <sub>4</sub> <sup>2-</sup> (H <sub>2</sub> O) <sub>6</sub>           | 18  | 0.0, 0.1  | 0.0, 0.2   |
| SW49Rel345  | Isomerisation energies of SO <sub>4</sub> <sup>2-</sup> (H <sub>2</sub> O) <sub>n</sub> (n = 3-5)      | 31  | 0.0, 0.3  | 0.0, 0.3   |
| SW49Rel6    | Isomerisation energies of SO <sub>4</sub> <sup>2-</sup> (H <sub>2</sub> O) <sub>6</sub>                | 18  | 0.0, 0.2  | 0.0, 0.2   |
| TA13        | Binding energies of dimers involving radicals                                                          | 13  | 0.0, 0.1  | -0.2, -0.3 |
| TAE140MR    | Total atomisation energies (multi-reference cases)                                                     | 16  | 0.0, 0.1  | -1.1, -1.6 |
| TAE140nonMR | Total atomisation energies (single-reference cases)                                                    | 124 | -0.2, 0.0 | -0.3, -1.2 |
| WATER27     | Binding energies of neutral and charged water clusters                                                 | 23  | 0.0, 0.2  | 0.0, 0.2   |
| WCPT27      | Barrier heights of water-catalysed proton-transfer reactions                                           | 27  | 0.0, -0.1 | -0.1, -0.1 |
| WCPT6       | Tautomerisation energies for water-catalysed proton-transfer reactions                                 | 6   | 0.0, 0.1  | 0.0, 0.1   |
| X40         | Binding energies of non-covalent interactions involving halogenated molecules                          | 31  | 0.0, 0.3  | 0.0, 0.3   |



|         |                                                           |     |          |          |
|---------|-----------------------------------------------------------|-----|----------|----------|
| XB18    | Binding energies of small halogen-bonded dimers           | 8   | 0.0, 0.1 | 0.0, 0.1 |
| XB51    | Binding energies of large halogen-bonded dimers           | 20  | 0.0, 0.2 | 0.0, 0.2 |
| YMPJ519 | Isomerisation energies of the pro-teino-genic amino acids | 519 | 0.0, 5.4 | 0.0, 5.4 |

---



---

## References

- [1] Mardirossian, N.; Head-Gordon, M. Thirty years of density functional theory in computational chemistry: an overview and extensive assessment of 200 density functionals. *Mol. Phys.* **2017**, *115*, 2315–2372.
